# Supplementary material for: A biomimetic cerium-based biosensor for the direct visual detection of phosphate under physiological conditions
Source: Royal Society of Chemistry journal article supplement (doi:10.1039/c9cc04840e), 2019-01-01
Supplement: c9cc04840e1.pdf [file c9cc04840e1.pdf]

## **Supporting information of: A biomimetic cerium-based biosensor for the direct visual detection of phosphate under physiological conditions**

**Dr. Thibaud Rossel<sup>a</sup> and Dr. Marc Creus<sup>b</sup>**

<sup>a</sup> Gymnase français de Bienne, Rue du Débarcadère 8, 2503 Bienne, Switzerland.  
E-mail: [thibaud.rossel@emsp.gfbienne.ch](mailto:thibaud.rossel@emsp.gfbienne.ch)

<sup>b</sup> University of Basel, Klingelbergstrasse 50/70, 4056 Basel, Switzerland.  
E-mail: [marc.creus@unibas.ch](mailto:marc.creus@unibas.ch)

### **Ligand and complex synthesis:**

The ligand synthesis of HXTA-H<sub>5</sub> and the formation of the complex [Ce<sub>2</sub>(HXTA)]<sup>3+</sup> was performed using the described procedure by Que *et al.*<sup>1</sup>

<sup>1</sup>Branum, M. E., Tipton, A. K., Zhu, S., and Que, L. (2001). *J. Am. Chem. Soc.*, **2001**, 123, 1898–1904.

### **Assay:**

The assay was performed with a TECAN safire 2 multiwell-plate spectrophotometer using magellan software to analyse spectra.

### **Stock solutions:**

The following stock solutions should be prepared freshly (within minutes for CAN) before each round of experiments:

- 1) A stock solution of HEPES of 100 mM pH = 7. The pH of the solution is adjusted by solid NaOH.
- 2) A stock solution of 0.2 M of CAN, prepared by dissolving the appropriate amount of salt in HEPES 100 mM pH = 7
- 3) A stock solution of 0.1 M of HXTA-H<sub>5</sub>, prepared by dissolving the appropriate amount of ligand in HEPES 100 mM pH = 7
- 4) A stock solution of 0.1 M of PCV, prepared by dissolving the appropriate amount of catechol in HEPES 100 mM pH = 7
- 5) A stock solution of 0.1 M of Na<sub>3</sub>PO<sub>4</sub>, prepared by dissolving the appropriate amount of salt in HEPES 100 mM pH = 7

### **Working solutions:**

Working solutions are prepared by a 100 x dilution in HEPES 100 mM pH = 7 (final concentration of compounds = 100 μM or 200 μM for the metal precursor). Working solutions are prepared each time for experiments. A 96 multiwell-plate is filled with working solutions.

## Details of figure 2:

**Well 1:** 25  $\mu\text{L}$  of PCV and 75  $\mu\text{L}$  with HEPES buffer 100 mM pH=7

**Well 2:** 25  $\mu\text{L}$  of CAN, 25  $\mu\text{L}$  of HXTA-H<sub>5</sub> and 50  $\mu\text{L}$  with HEPES buffer 100 mM pH=7

**Well 3:** 25  $\mu\text{L}$  of CAN, 25  $\mu\text{L}$  of HXTA-H<sub>5</sub>, 25  $\mu\text{L}$  of PCV, 25  $\mu\text{L}$  and 25  $\mu\text{L}$  with HEPES buffer 100 mM pH=7.4.

**Well 4:** 25  $\mu\text{L}$  of CAN, 25  $\mu\text{L}$  of HXTA-H<sub>5</sub>, 25  $\mu\text{L}$  of PCV, 25  $\mu\text{L}$  of  $\text{PO}_4^{3-}$ .

A full scan is recorded for each well (with a spectrophotometer allowing comparison between the wells). Colorimetric differentiation can also be carried out with the naked-eye.

## Duplicates of the figure 3:

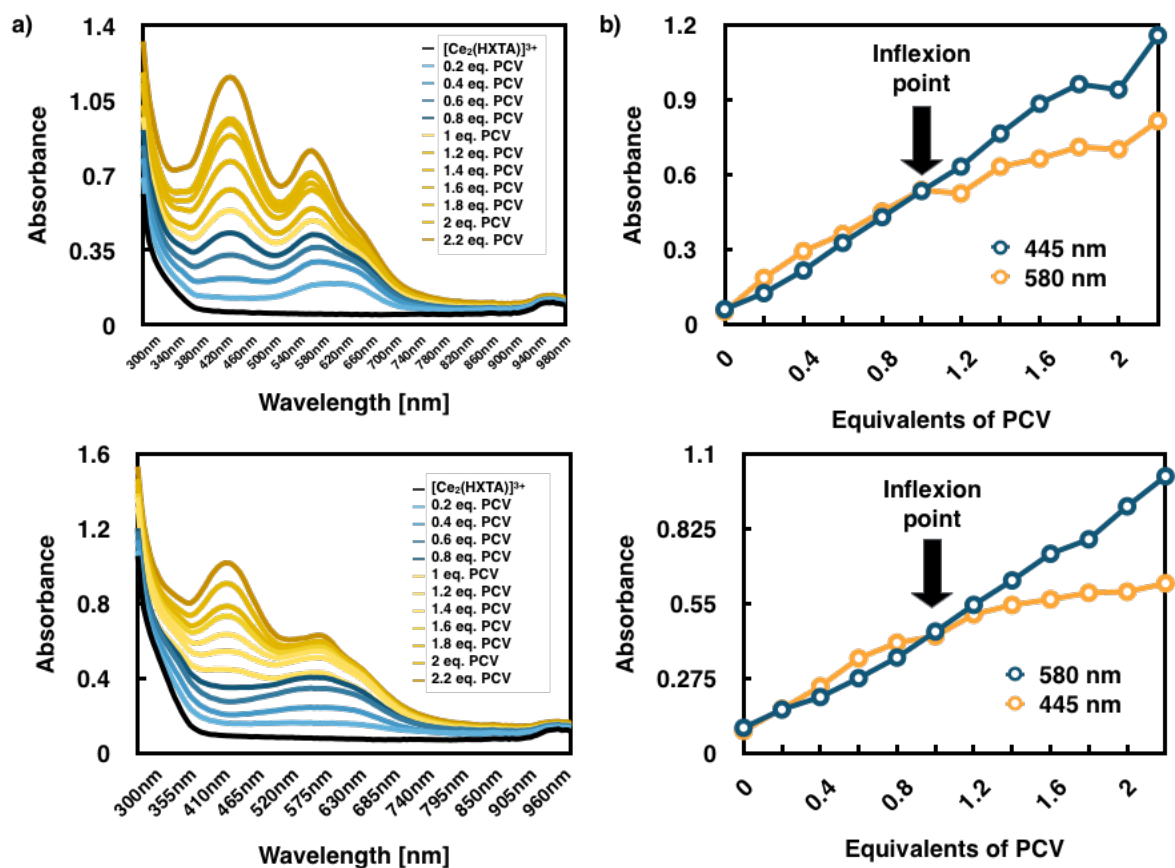

**Details of the figure 3:***A 96 well plate is filled as presented in the following table:*

|                | <b>CAN</b><br>Final: 666 $\mu\text{M}$ | <b>HXTA-H<sub>5</sub></b><br>Final: 333 $\mu\text{M}$ | <b>PCV</b><br>Final: 0 - 916 $\mu\text{M}$ | <b>HEPES</b><br>100 mM pH = 7 |
|----------------|----------------------------------------|-------------------------------------------------------|--------------------------------------------|-------------------------------|
| <b>Well 1</b>  | 25 $\mu\text{L}$                       | 25 $\mu\text{L}$                                      | - (0 eq.)                                  | 25 $\mu\text{L}$              |
| <b>Well 2</b>  | 25 $\mu\text{L}$                       | 25 $\mu\text{L}$                                      | 0.5 $\mu\text{L}$ (0.2 eq.)                | 24.5 $\mu\text{L}$            |
| <b>Well 3</b>  | 25 $\mu\text{L}$                       | 25 $\mu\text{L}$                                      | 1 $\mu\text{L}$ (0.4 eq.)                  | 24 $\mu\text{L}$              |
| <b>Well 4</b>  | 25 $\mu\text{L}$                       | 25 $\mu\text{L}$                                      | 1.5 $\mu\text{L}$ (0.6 eq.)                | 23.5 $\mu\text{L}$            |
| <b>Well 5</b>  | 25 $\mu\text{L}$                       | 25 $\mu\text{L}$                                      | 2 $\mu\text{L}$ (0.8 eq.)                  | 23 $\mu\text{L}$              |
| <b>Well 6</b>  | 25 $\mu\text{L}$                       | 25 $\mu\text{L}$                                      | 2.5 $\mu\text{L}$ (1. eq.)                 | 22.5 $\mu\text{L}$            |
| <b>Well 7</b>  | 25 $\mu\text{L}$                       | 25 $\mu\text{L}$                                      | 3 $\mu\text{L}$ (1.2 eq.)                  | 22 $\mu\text{L}$              |
| <b>Well 8</b>  | 25 $\mu\text{L}$                       | 25 $\mu\text{L}$                                      | 3.5 $\mu\text{L}$ (1.4 eq.)                | 21.5 $\mu\text{L}$            |
| <b>Well 9</b>  | 25 $\mu\text{L}$                       | 25 $\mu\text{L}$                                      | 4 $\mu\text{L}$ (1.6 eq.)                  | 21 $\mu\text{L}$              |
| <b>Well 10</b> | 25 $\mu\text{L}$                       | 25 $\mu\text{L}$                                      | 4.5 $\mu\text{L}$ (1.8 eq.)                | 20.5 $\mu\text{L}$            |
| <b>Well 11</b> | 25 $\mu\text{L}$                       | 25 $\mu\text{L}$                                      | 5 $\mu\text{L}$ (2 eq.)                    | 20 $\mu\text{L}$              |
| <b>Well 12</b> | 25 $\mu\text{L}$                       | 25 $\mu\text{L}$                                      | 5.5 $\mu\text{L}$ (2.2 eq.)                | 19.5 $\mu\text{L}$            |

A full scan is recorded for each well.

Colorimetric differentiation can also be carried out with the naked-eye.

**Details of the figure 4:***A 96 well plate is filled as presented in the following table:*

|                | <b>CAN</b><br>Final: 500 $\mu\text{M}$ | <b>HXTA-H<sub>5</sub></b><br>Final: 250 $\mu\text{M}$ | <b>PCV</b><br>Final: 500-0 $\mu\text{M}$ | <b>HEPES</b><br>100 mM pH = 7 |
|----------------|----------------------------------------|-------------------------------------------------------|------------------------------------------|-------------------------------|
| <b>Well 1</b>  | 25 $\mu\text{L}$                       | 25 $\mu\text{L}$                                      | 50 $\mu\text{L}$                         | 0 $\mu\text{L}$               |
| <b>Well 2</b>  | 25 $\mu\text{L}$                       | 25 $\mu\text{L}$                                      | 45 $\mu\text{L}$                         | 5 $\mu\text{L}$               |
| <b>Well 3</b>  | 25 $\mu\text{L}$                       | 25 $\mu\text{L}$                                      | 40 $\mu\text{L}$                         | 10 $\mu\text{L}$              |
| <b>Well 4</b>  | 25 $\mu\text{L}$                       | 25 $\mu\text{L}$                                      | 35 $\mu\text{L}$                         | 15 $\mu\text{L}$              |
| <b>Well 5</b>  | 25 $\mu\text{L}$                       | 25 $\mu\text{L}$                                      | 30 $\mu\text{L}$                         | 20 $\mu\text{L}$              |
| <b>Well 6</b>  | 25 $\mu\text{L}$                       | 25 $\mu\text{L}$                                      | 25 $\mu\text{L}$                         | 25 $\mu\text{L}$              |
| <b>Well 7</b>  | 25 $\mu\text{L}$                       | 25 $\mu\text{L}$                                      | 20 $\mu\text{L}$                         | 30 $\mu\text{L}$              |
| <b>Well 8</b>  | 25 $\mu\text{L}$                       | 25 $\mu\text{L}$                                      | 15 $\mu\text{L}$                         | 35 $\mu\text{L}$              |
| <b>Well 9</b>  | 25 $\mu\text{L}$                       | 25 $\mu\text{L}$                                      | 10 $\mu\text{L}$                         | 40 $\mu\text{L}$              |
| <b>Well 10</b> | 25 $\mu\text{L}$                       | 25 $\mu\text{L}$                                      | 5 $\mu\text{L}$                          | 45 $\mu\text{L}$              |
| <b>Well 11</b> | 25 $\mu\text{L}$                       | 25 $\mu\text{L}$                                      | 0 $\mu\text{L}$                          | 50 $\mu\text{L}$              |

A full scan is recorded for each well with a spectrophotometer (Tecan safire 2) allowing comparison between the wells. Colorimetric differentiation can also be carried out with the naked-eye.

### Details of the figure 5:

Additional tests for the detection of anions at 10  $\mu\text{M}$  of complex  $[\text{Ce}_2(\text{HXTA})]^{3+}$ :

Preparation of  $[(\text{Ce}_2(\text{HXTA})(\text{PCV}))]^+$ :

A stock solution of 0.01 M of  $[(\text{Ce}_2(\text{HXTA})(\text{PCV}))]^+$  is prepared by mixing: 500  $\mu\text{L}$  of 0.01 M solution of ligand with 500  $\mu\text{L}$  of 0.02 M solution of metal precursor and 500  $\mu\text{L}$  of 0.01 M of PCV.

The stock solution is diluted 10 times with HEPES 100 mM pH=7 to form the working solution.

**A 96 well plate is filled as presented in the following table:**

|                | $[(\text{Ce}_2(\text{HXTA})(\text{PCV}))]^+$<br>Final: 10 $\mu\text{M}$ | Anions<br>Final: 10 $\mu\text{M}$ | Anions                    | HEPES<br>100 mM pH=7 |
|----------------|-------------------------------------------------------------------------|-----------------------------------|---------------------------|----------------------|
| <b>Well 1</b>  | 5 $\mu\text{L}$                                                         | 15 $\mu\text{L}$                  | NaCl                      | 30 $\mu\text{L}$     |
| <b>Well 2</b>  | 5 $\mu\text{L}$                                                         | 15 $\mu\text{L}$                  | NaBr                      | 30 $\mu\text{L}$     |
| <b>Well 3</b>  | 5 $\mu\text{L}$                                                         | 15 $\mu\text{L}$                  | $\text{NaNO}_3$           | 30 $\mu\text{L}$     |
| <b>Well 4</b>  | 5 $\mu\text{L}$                                                         | 15 $\mu\text{L}$                  | $\text{NaIO}_3$           | 30 $\mu\text{L}$     |
| <b>Well 5</b>  | 5 $\mu\text{L}$                                                         | 15 $\mu\text{L}$                  | $\text{Na}_2\text{CO}_3$  | 30 $\mu\text{L}$     |
| <b>Well 6</b>  | 5 $\mu\text{L}$                                                         | 15 $\mu\text{L}$                  | HCOONa                    | 30 $\mu\text{L}$     |
| <b>Well 7</b>  | 5 $\mu\text{L}$                                                         | 15 $\mu\text{L}$                  | $\text{CH}_3\text{COONa}$ | 30 $\mu\text{L}$     |
| <b>Well 8</b>  | 5 $\mu\text{L}$                                                         | 15 $\mu\text{L}$                  | Na Citrate                | 30 $\mu\text{L}$     |
| <b>Well 9</b>  | 5 $\mu\text{L}$                                                         | 15 $\mu\text{L}$                  | $\text{Na}_3\text{PO}_4$  | 30 $\mu\text{L}$     |
| <b>Well 10</b> | 5 $\mu\text{L}$                                                         | 15 $\mu\text{L}$                  | Na salicylate             | 30 $\mu\text{L}$     |
| <b>Well 11</b> | 5 $\mu\text{L}$                                                         | 15 $\mu\text{L}$                  | Na pyrophosphate          | 30 $\mu\text{L}$     |

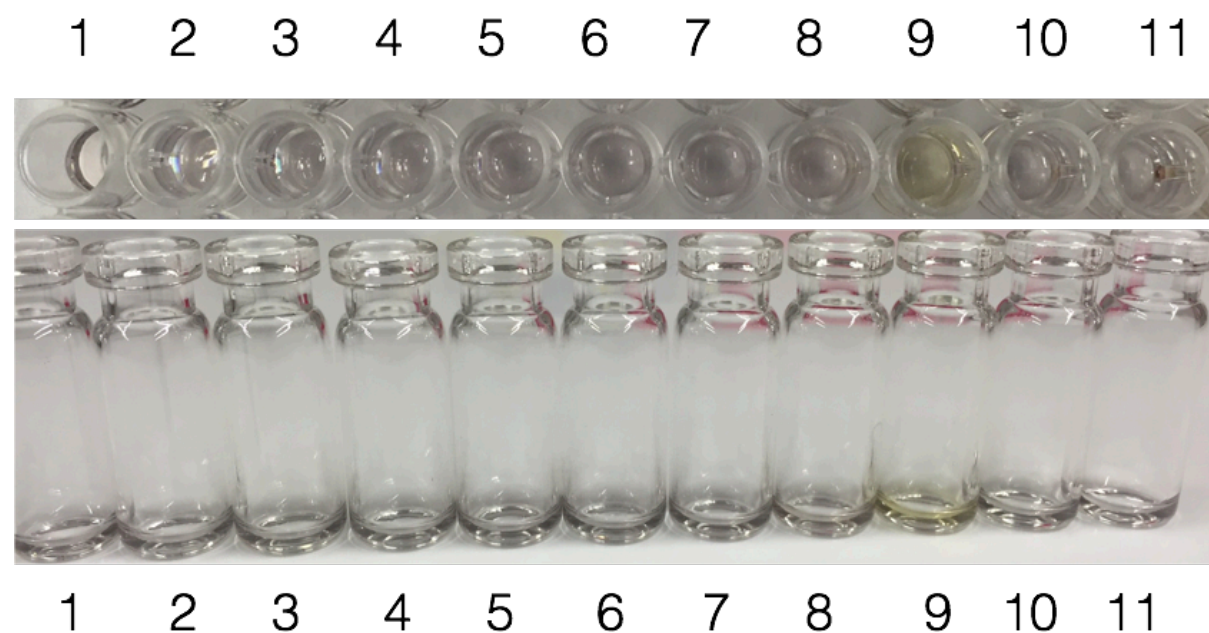

**Picture 1:** From left to right; NaCl (1), NaBr (2),  $\text{NaNO}_3$  (3),  $\text{NaIO}_3$  (4),  $\text{Na}_2\text{CO}_3$  (5), HCOONa (6),  $\text{CH}_3\text{COONa}$  (7), Na citrate (8),  $\text{Na}_3\text{PO}_4$  (9), Na salicylate (10), Na pyrophosphate (11).

Details of the figure 6:

A 96 well plate is filled as presented in the following table:

|         | $[(\text{Ce}_2(\text{HXTA})(\text{PCV}))^+]$<br>Final: 250 $\mu\text{M}$ | $\text{PO}_4^{3-}$<br>Final: 500-0 $\mu\text{M}$ | HEPES<br>100 mM pH = 7 |
|---------|--------------------------------------------------------------------------|--------------------------------------------------|------------------------|
| Well 1  | 25 $\mu\text{L}$                                                         | 50 $\mu\text{L}$                                 | 25 $\mu\text{L}$       |
| Well 2  | 25 $\mu\text{L}$                                                         | 45 $\mu\text{L}$                                 | 30 $\mu\text{L}$       |
| Well 3  | 25 $\mu\text{L}$                                                         | 40 $\mu\text{L}$                                 | 35 $\mu\text{L}$       |
| Well 4  | 25 $\mu\text{L}$                                                         | 35 $\mu\text{L}$                                 | 40 $\mu\text{L}$       |
| Well 5  | 25 $\mu\text{L}$                                                         | 30 $\mu\text{L}$                                 | 45 $\mu\text{L}$       |
| Well 6  | 25 $\mu\text{L}$                                                         | 25 $\mu\text{L}$                                 | 50 $\mu\text{L}$       |
| Well 7  | 25 $\mu\text{L}$                                                         | 20 $\mu\text{L}$                                 | 55 $\mu\text{L}$       |
| Well 8  | 25 $\mu\text{L}$                                                         | 15 $\mu\text{L}$                                 | 60 $\mu\text{L}$       |
| Well 9  | 25 $\mu\text{L}$                                                         | 10 $\mu\text{L}$                                 | 65 $\mu\text{L}$       |
| Well 10 | 25 $\mu\text{L}$                                                         | 5 $\mu\text{L}$                                  | 70 $\mu\text{L}$       |
| Well 11 | 25 $\mu\text{L}$                                                         | 0 $\mu\text{L}$                                  | 75 $\mu\text{L}$       |

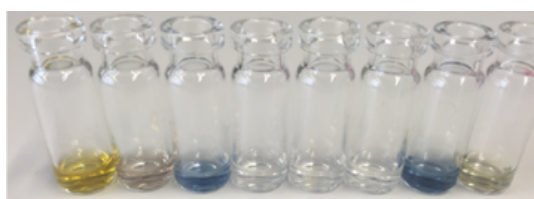

$[(\text{Ce}_2(\text{HXTA})(\text{PO}_4^{3-}))^+] + \text{PCV}$   
 PCV  
 $[(\text{Ce}_2(\text{HXTA})(\text{PCV}))^+]$   
 CAN  
 $[(\text{Ce}_2(\text{HXTA}))^{2+}]$   
 $[(\text{Ce}_2(\text{HXTA})(\text{PO}_4^{3-}))^+]$   
 CAN + PCV  
 CAN + PCV +  $\text{PO}_4^{3-}$

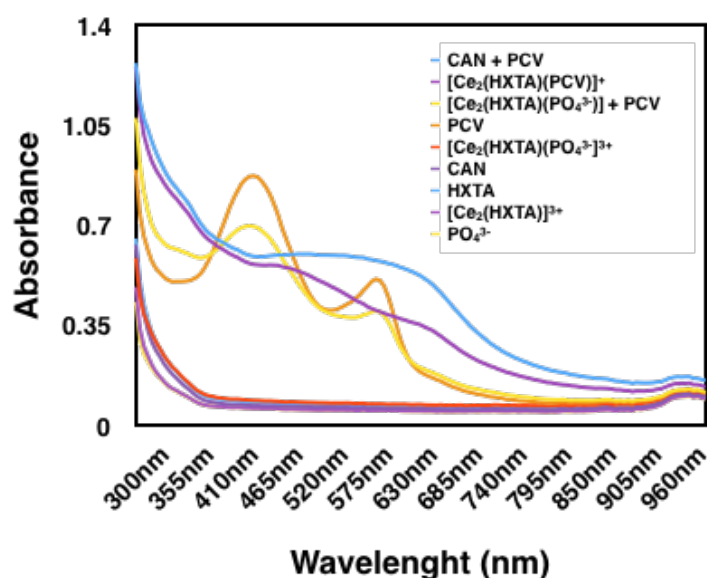

Picture 1 : Additional controls

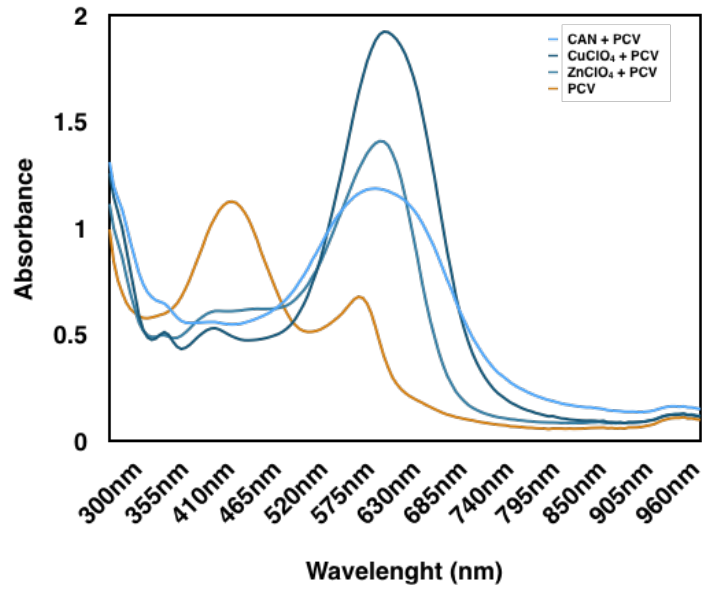

Picture 2 : Additional controls

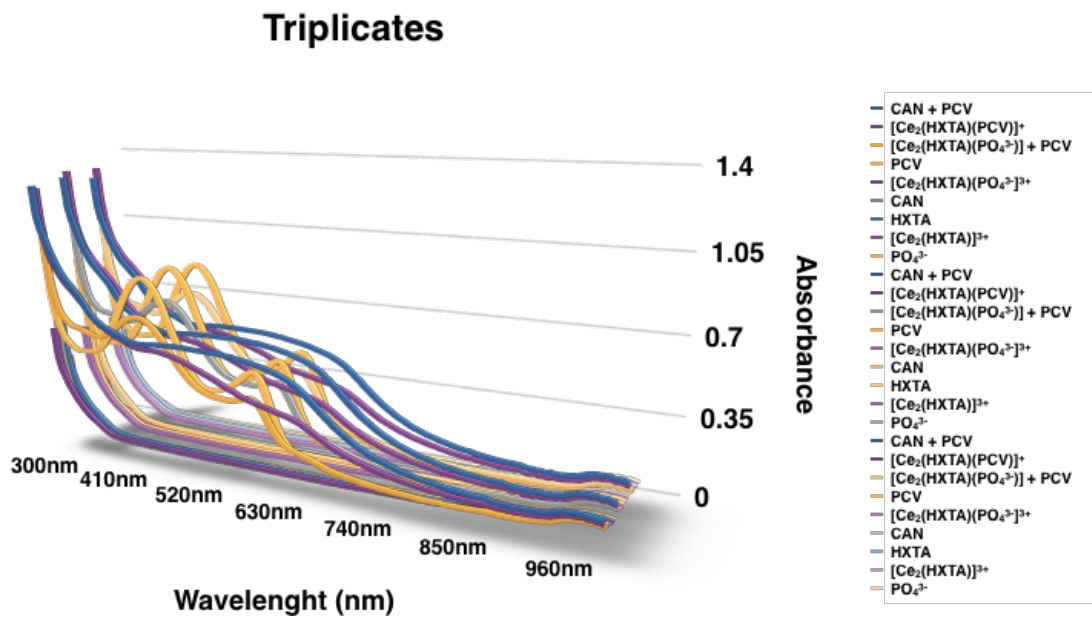

Picture 3 : Triplicates of the figure 2

## Affinity constant determination:

The determination of the  $k_a$  constant of  $[(Ce_2(HXTA)(PCV)]^+$  was performed using described procedures in the supporting information by<sup>2</sup>

<sup>2</sup>Wenxiang Yu, Jian Qiang, Jun Yin, Srinivasulu Kambam, Fang Wang, Yong Wang and Xiaoqiang Chen *Org. Lett.*, **2014**, *16* (8), 2220–2223.

### 1) PCV titration

A stock solution of complex  $[Ce_2(HXTA)]^{3+}$  is prepared as following:

200  $\mu$ L of 0.001 M (100 x dilution) CAN in 0.1 M HEPES pH = 7 is mixed with 100  $\mu$ L of HXTA of 0.001M (100 x dilution) in 0.1 M HEPES pH = 7

PCV solution:

1000  $\mu$ L of 0.0001 M of PCV (1000x dilution) in HEPES 0.1 M pH = 7

**A 96 well plate is filled as following (3 times):**

| N°      | Volume PCV [ $\mu$ L] | Volume $[Ce_2(HXTA)]^{3+}$ [ $\mu$ L] | Buffer volume [ $\mu$ L] | Total volume [ $\mu$ L] |
|---------|-----------------------|---------------------------------------|--------------------------|-------------------------|
| Well 1  | 20                    | 20                                    | 60                       | 100                     |
| Well 2  | 20                    | 17.5                                  | 62.5                     | 100                     |
| Well 3  | 20                    | 15                                    | 65                       | 100                     |
| Well 4  | 20                    | 12.5                                  | 67.5                     | 100                     |
| Well 5  | 20                    | 10                                    | 70                       | 100                     |
| Well 6  | 20                    | 7.5                                   | 72.5                     | 100                     |
| Well 7  | 20                    | 5                                     | 75                       | 100                     |
| Well 8  | 20                    | 4                                     | 76                       | 100                     |
| Well 9  | 20                    | 3                                     | 77                       | 100                     |
| Well 10 | 20                    | 2                                     | 78                       | 100                     |
| Well 11 | 20                    | 1                                     | 79                       | 100                     |
| Well 12 | 20                    | 0                                     | 80                       | 100                     |

**Measurements:**

| N°      | PCV ( $\mu$ M) | C ( $\mu$ M) | Measurements at 445 nm | Measurements at 580 nm |
|---------|----------------|--------------|------------------------|------------------------|
| Well 1  | 20             | 66.67        | 0.0907                 | <b>0.13</b>            |
| Well 2  | 20             | 58.33        | 0.1672                 | <b>0.1292</b>          |
| Well 3  | 20             | 50.00        | 0.1057                 | <b>0.1254</b>          |
| Well 4  | 20             | 41.67        | 0.0958                 | <b>0.1199</b>          |
| Well 5  | 20             | 33.33        | 0.0867                 | <b>0.1166</b>          |
| Well 6  | 20             | 25.00        | 0.0893                 | <b>0.1108</b>          |
| Well 7  | 20             | 16.67        | 0.0958                 | <b>0.1048</b>          |
| Well 8  | 20             | 13.33        | 0.1017                 | <b>0.0997</b>          |
| Well 9  | 20             | 10.00        | 0.1097                 | <b>0.0974</b>          |
| Well 10 | 20             | 6.67         | 0.1194                 | <b>0.0936</b>          |
| Well 11 | 20             | 3.33         | 0.1317                 | <b>0.0898</b>          |
| Well 12 | 20             | 0.00         | 0.1256                 | <b>0.0884</b>          |

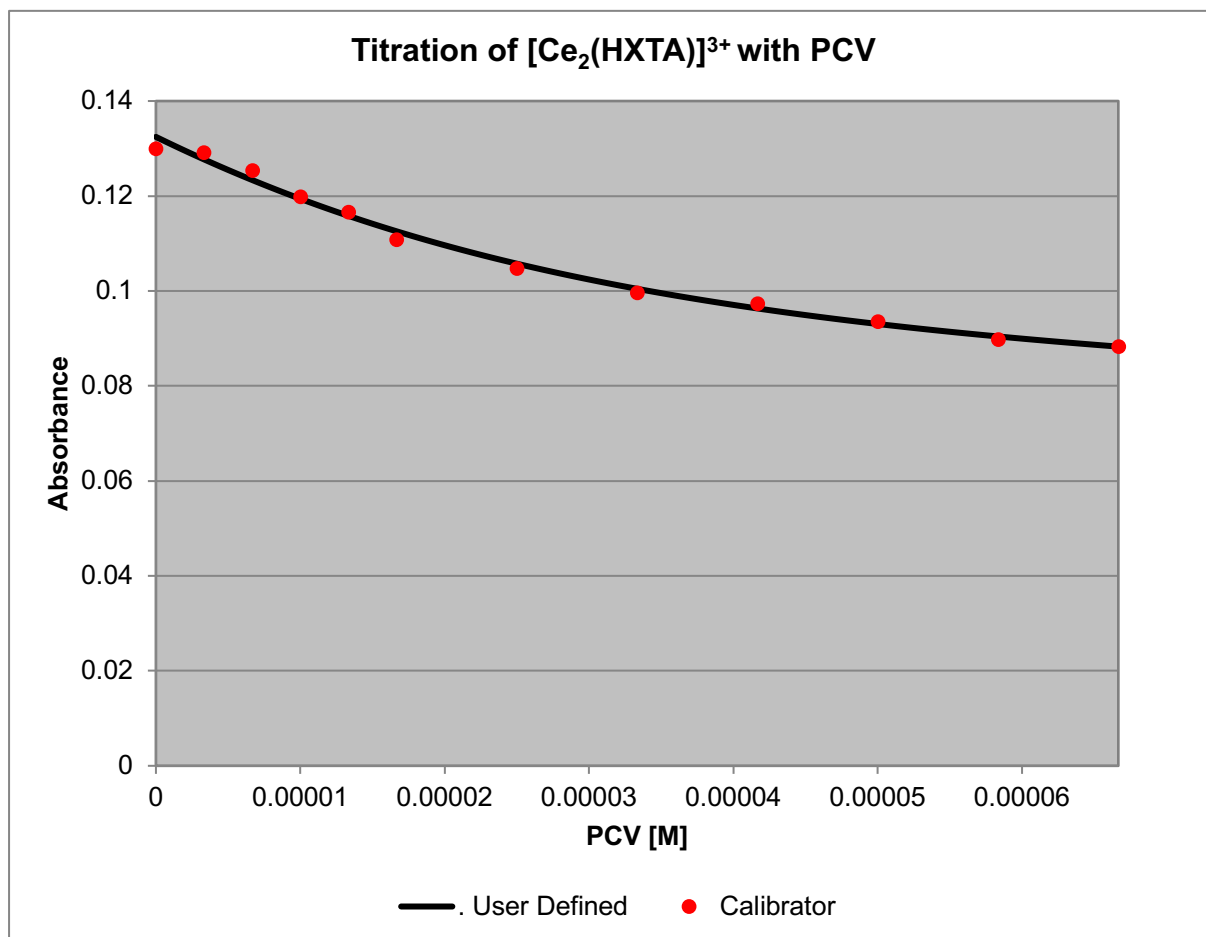

Equation:  $\text{Absorbance} = n + a \cdot \sqrt{(0.00002 + x + 1/K_a)^2 - 0.00008 \cdot x} + a \cdot (0.00002 - x - 1/K_a)$

| Coeff. | Value              | $\pm$ Error         |
|--------|--------------------|---------------------|
| a      | 1575.54512518984   | 134.298582564086    |
| k      | 44479.7316983058   | 12559.1660127683    |
| n      | 0.0694256272576168 | 0.00582209059595647 |

| Measure        | Value             |
|----------------|-------------------|
| R <sup>2</sup> | 0.996298173335589 |

Calculated affinity constant using Stata SE:  $K_a = 44479 \text{ M}^{-1}$



## 2) Phosphate titration

A stock solution is prepared as following:

200  $\mu\text{L}$  of 0.001 M (100x) CAN in 0.1 M HEPES pH = 7 is mixed with  
100  $\mu\text{L}$  of HXTA of 0.001M (100x) in 0.1 M HEPES pH = 7 is mixed with  
100  $\mu\text{L}$  of PCV of 0.001M (100x) in 0.1 M HEPES pH = 7 is mixed with

The stock solution is diluted 2.5 times.

Phosphate solution:

A 100x time dilution of phosphate in HEPES 0.1 M pH = 7

**A 96 well plate is filled as following (3 times):**

| N°      | Volume $[(\text{Ce}_2(\text{HXTA})(\text{PCV}))^+]$ [ $\mu\text{L}$ ] | Volume analyte [ $\mu\text{L}$ ] | Buffer volume [ $\mu\text{L}$ ] | Total volume [ $\mu\text{L}$ ] |
|---------|-----------------------------------------------------------------------|----------------------------------|---------------------------------|--------------------------------|
| Well 1  | 20                                                                    | 20                               | 60                              | 100                            |
| Well 2  | 20                                                                    | 17.5                             | 62.5                            | 100                            |
| Well 3  | 20                                                                    | 15                               | 65                              | 100                            |
| Well 4  | 20                                                                    | 12.5                             | 67.5                            | 100                            |
| Well 5  | 20                                                                    | 10                               | 70                              | 100                            |
| Well 6  | 20                                                                    | 7.5                              | 72.5                            | 100                            |
| Well 7  | 20                                                                    | 5                                | 75                              | 100                            |
| Well 8  | 20                                                                    | 4                                | 76                              | 100                            |
| Well 9  | 20                                                                    | 3                                | 77                              | 100                            |
| Well 10 | 20                                                                    | 2                                | 78                              | 100                            |
| Well 11 | 20                                                                    | 1                                | 79                              | 100                            |
| Well 12 | 20                                                                    | 0                                | 80                              | 100                            |

**Measurements:**

| N°      | PCV ( $\mu\text{M}$ ) | $[(\text{Ce}_2(\text{HXTA})(\text{PCV}))^+]$ ( $\mu\text{M}$ ) | Measurements at 445 [nm] | Measurements at 580 [nm] |
|---------|-----------------------|----------------------------------------------------------------|--------------------------|--------------------------|
| Well 1  | 20                    | 66.67                                                          | <b>0.1083</b>            | 0.0684                   |
| Well 2  | 20                    | 58.33                                                          | <b>0.0996</b>            | 0.0695                   |
| Well 3  | 20                    | 50.00                                                          | <b>0.0954</b>            | 0.0694                   |
| Well 4  | 20                    | 41.67                                                          | <b>0.0866</b>            | 0.0728                   |
| Well 5  | 20                    | 33.33                                                          | <b>0.078</b>             | 0.0753                   |
| Well 6  | 20                    | 25.00                                                          | <b>0.0757</b>            | 0.0715                   |
| Well 7  | 20                    | 16.67                                                          | <b>0.0707</b>            | 0.079                    |
| Well 8  | 20                    | 13.33                                                          | <b>0.0739</b>            | 0.0767                   |
| Well 9  | 20                    | 10.00                                                          | <b>0.0723</b>            | 0.0914                   |
| Well 10 | 20                    | 6.67                                                           | <b>0.0677</b>            | 0.0966                   |
| Well 11 | 20                    | 3.33                                                           | <b>0.0736</b>            | 0.0977                   |
| Well 12 | 20                    | 0.00                                                           | <b>0.0681</b>            | 0.1049                   |

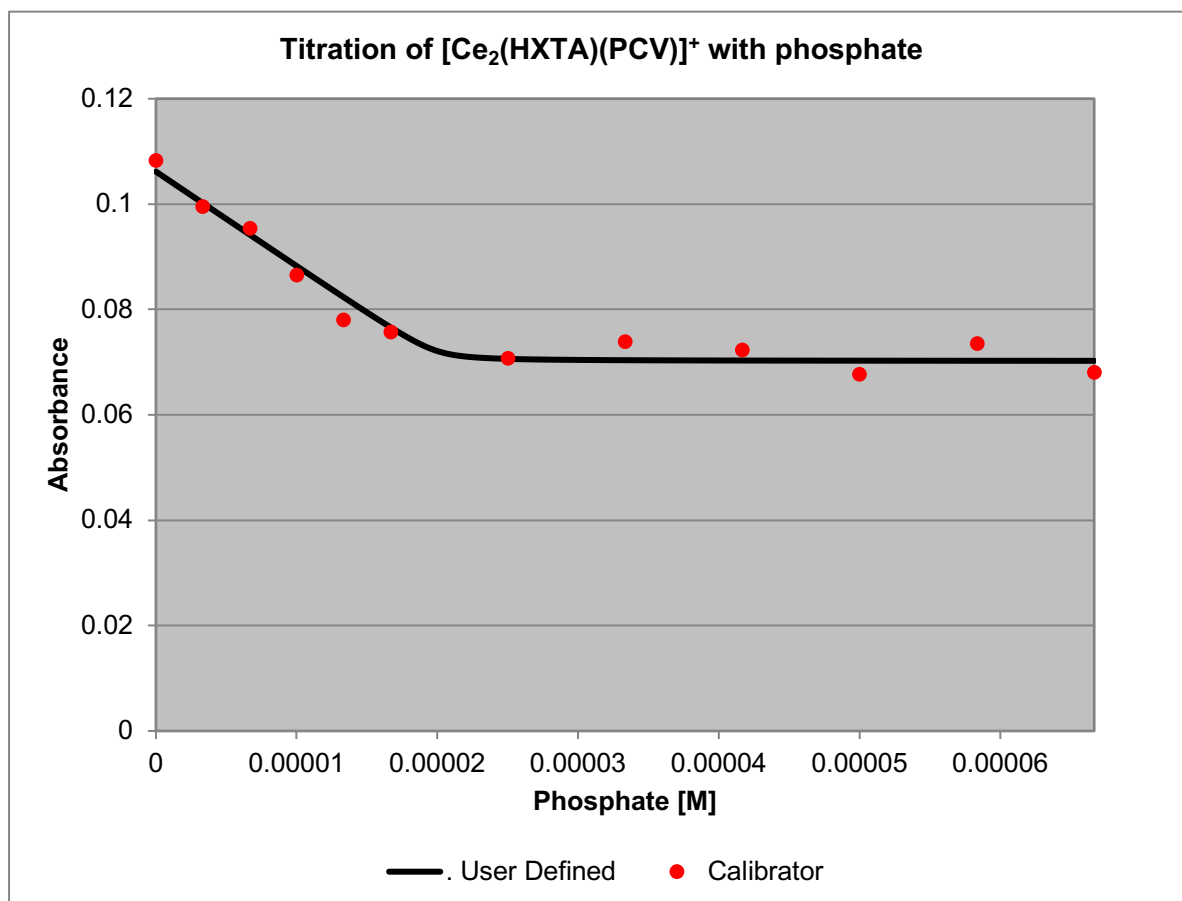

Equation:  $\text{Absorbance} = n + m \cdot (0.00002 + x - \sqrt{(0.00002 - x)^2 + 0.00008 \cdot K_b \cdot x}) / (1 - K_b)$

| Coeff. | Value             | ± Error            |
|--------|-------------------|--------------------|
| m      | -899.062057237362 | 53.220816910875    |
| k      | 0.0031894         | 0.0171249          |
| n      | 0.106172817884357 | 0.0016777559231092 |

| Measure        | Value             |
|----------------|-------------------|
| R <sup>2</sup> | 0.966145577869551 |

Calculated affinity constant using Stata SE: **K<sub>b</sub> = 0.0031 M<sup>-1</sup>**

**Determination of the affinity constants:**

$$k = \frac{K_a}{K_b}$$

$$K_a = 4.479 \times 10^4 \text{ M}^{-1}$$

$$K_b = K_a / k = 44790 \times 10^4 / 0.0031 = 1.44 \times 10^7 \text{ M}^{-1}$$

## Titration with PCV

Wells: 1 2 3 4 5 6 7 8 9 10 11

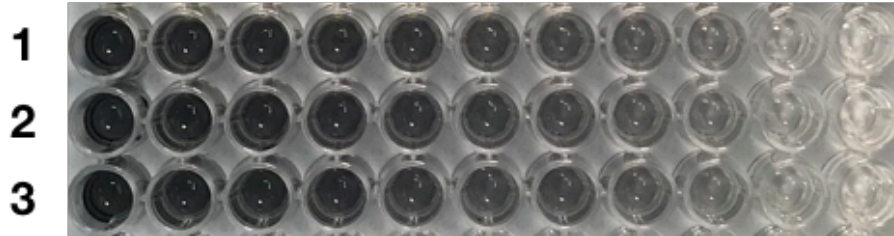

## Titration with $\text{PO}_4^{3-}$

Wells: 1 2 3 4 5 6 7 8 9 10 11

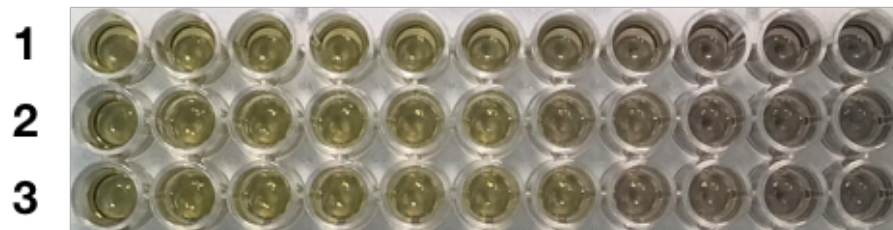

Picture 4: Visual results of the titration in triplicates

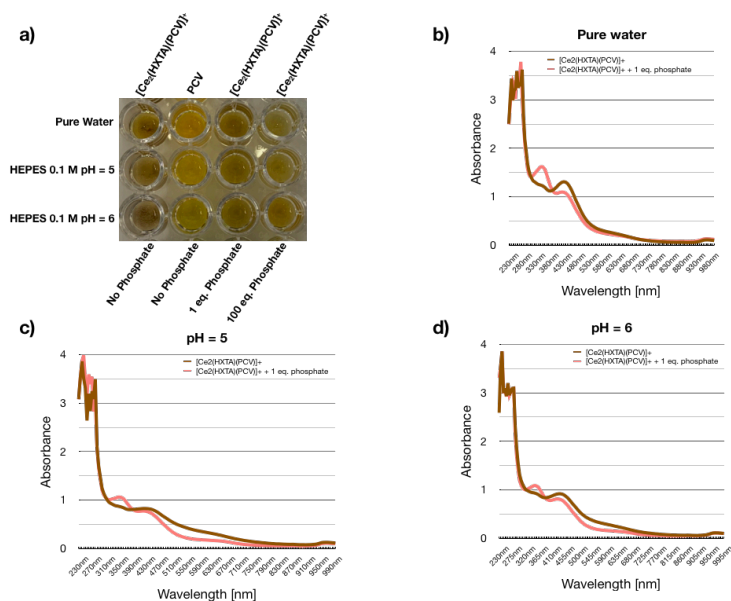

**Picture 5:** a) Screening for the detection of phosphate with  $[Ce_2(HXTA)(PCV)]^+$  (250  $\mu\text{M}$ ) at various pHs and in pure water. b) Absorbance spectra (in brown) of  $[Ce_2(HXTA)(PCV)]^+$  and in the presence of 1 eq. of phosphate (in red) in pure water. c) Absorbance spectra (in brown) of  $[Ce_2(HXTA)(PCV)]^+$  and in the presence of 1 eq. of phosphate (in red) at pH = 5 in HEPES 100 mM. d) Absorbance spectra (in brown) of  $[Ce_2(HXTA)(PCV)]^+$  and in the presence of 1 eq. of phosphate (in red) at pH = 6 in HEPES 100 mM.

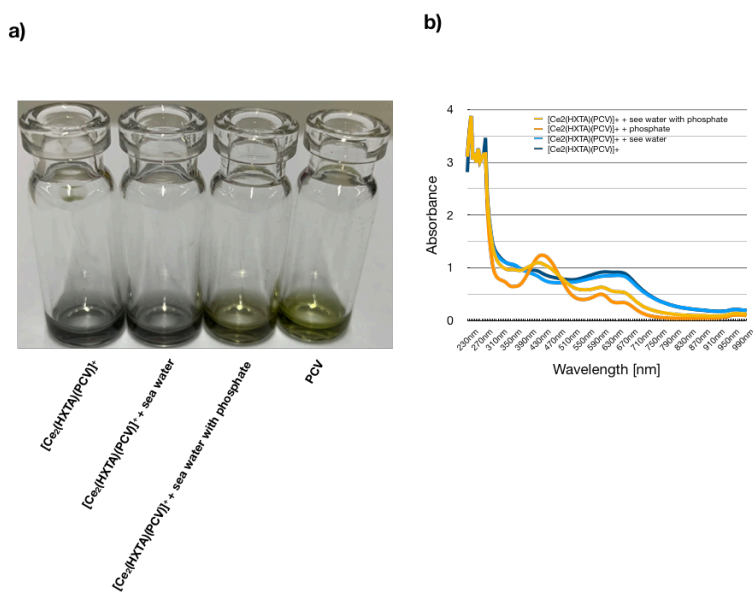

**Picture 6:** a) addition of sea water to the heteroleptic  $[Ce_2(HXTA)(PCV)]^+$  (250  $\mu\text{M}$ ) doesn't perturb the sensor. Addition of sea water spiked with phosphate (1 eq.) allows the recognition of phosphate in a complex medium. b) Absorbance spectra of the addition of phosphate to the sensor; in dark blue the sensor alone (250  $\mu\text{M}$  in HEPES 100 mM pH=7), in light blue the sensor in sea water, in yellow the sensor in the presence of 1 eq. of phosphate and in orange the sensor in the presence of sea water spiked with 1 eq. of phosphate.

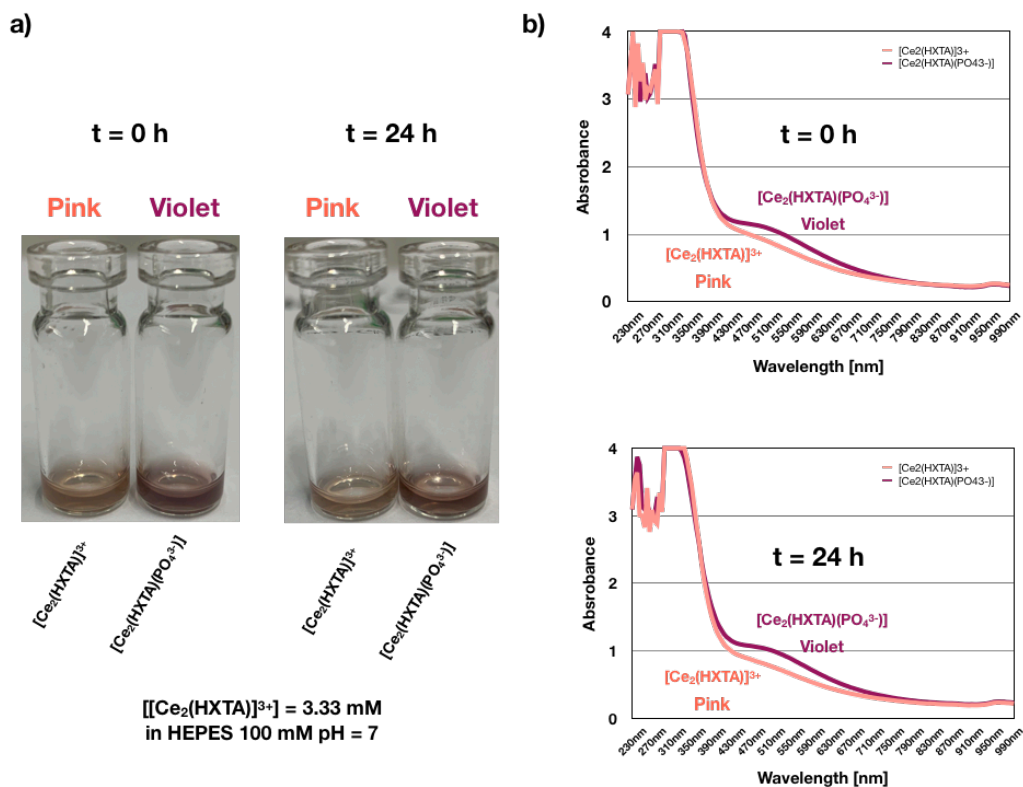

**Picture 7:** a) addition of phosphate (1 eq.) to the homoleptic complex  $[\text{Ce}_2(\text{HXTA})]^{3+}$  (250  $\mu\text{M}$ ) increases the absorbance of the complex between 390 to 670 nm turning the color of the complex from pink to violet and can be seen with the naked-eye. The formed complexes are at least stable 24h. b) Absorbance spectras of  $[\text{Ce}_2(\text{HXTA})]^{3+}$  in absence of phosphate (pink) or in the presence of phosphate (violet). The complexes are stable at least 24h.

**Table of the extinction coefficients at 2 wavelengths (425 nm and 595 nm):**

|                                                                   | $A_{(595 \text{ nm})}$ | $A_{(425 \text{ nm})}$ | $\epsilon_{(595 \text{ nm})}$ | $\epsilon_{(425 \text{ nm})}$ |
|-------------------------------------------------------------------|------------------------|------------------------|-------------------------------|-------------------------------|
| $[\text{Ce}_2(\text{HXTA})]^{3+}$                                 | 0.1841                 | 0.3225                 | 736                           | 1290                          |
| $[\text{Ce}_2(\text{HXTA})]^{3+} + \text{PCV} + \text{Phosphate}$ | 0.5370                 | 1.1406                 | 2148                          | 4562                          |
| PCV                                                               | 1.1469                 | 2.8219                 | 4587                          | 11287                         |
| $[\text{Ce}_2(\text{HXTA})]^{3+} + \text{PCV}$                    | 0.6750                 | 0.7690                 | 2700                          | 3076                          |
